# Supplementary material
Source: PubMed Central journal article supplement (PMC6525633)
Supplement: NIHMS1019876-supplement-Supplementary_Information.pdf [file NIHMS1019876-supplement-Supplementary_Information.pdf]

## Supplementary Materials for

### Delta-like protein 3 expression and therapeutic targeting in neuroendocrine prostate cancer

Loredana Puca, Katie Gavyert, Verena Sailer, Vincenza Conteduca, Etienne Dardenne, Michael Sigouros, Kumiko Isse, Megan Kearney, Aram Vosoughi, Luisa Fernandez, Heng Pan, Samaneh Motanagh, Judy Hess, Adam J. Donoghue, Andrea Sboner, Yuzhuo Wang, Ryan Dittamore, David Rickman, David M. Nanus, Scott T. Tagawa, Olivier Elemento, Juan Miguel Mosquera, Laura Saunders, Himisha Beltran\*

\*Corresponding author. Email: himisha\_beltran@dfci.harvard.edu

Published 20 March 2019, *Sci. Transl. Med.* **11**, eaav0891 (2019)

DOI: 10.1126/scitranslmed.aav0891

#### The PDF file includes:

- Fig. S1. Genotype-Tissue Expression (GTEx) expression of DLL3 in adult tissues.
- Fig. S2. Evaluation of DLL3-positive cells per tumor.
- Fig. S3. *DLL3* expression in patient with prostate cancer cohort by RNA-seq.
- Fig. S4. *DLL3* expression in prostate cancer cohort evaluated by NanoString.
- Fig. S5. DLL3-positive tumors evaluated by IHC, RNA-seq, and NanoString.
- Fig. S6. Representative images of DLL3 expression.
- Fig. S7. *DLL3* promoter methylation.
- Fig. S8. *ASCL1* expression evaluated by RNA-seq.
- Fig. S9. Differentially expression analysis of Notch signaling genes.
- Fig. S10. Silencing *DLL3* in the NCI-H660 cell line.
- Fig. S11. Correlation between DLL3-positive and DLL3-negative cells in a tumor biopsy.
- Fig. S12. DLL3 expression cutoff in CTCs.
- Fig. S13. CK expression in DLL3-positive and DLL3-negative CTCs.
- Fig. S14. Correlation between DLL3-positive and DLL3-negative cells in CTCs.
- Fig. S15. Expression of Notch receptors across subtypes of prostate cancer and correlation with DLL3 expression.
- Fig. S16. In vitro toxicity of SC16LD6.5 in NCI-H660 and DU145.
- Table S1. Clinical and pathological features of patients with CRPC-Adeno and PCA-expressing DLL3 by IHC.
- Table S2. Genomic features of WCM1388 patient metastatic sites.
- Table S3. Clinical features of patients with CRPC-Adeno with DLL3-positive CTCs.
- Table S4. Serum pharmacokinetics parameters after peritoneal administration of rovalpituzumab tesirine (SC16LD6.5).

**Other Supplementary Material for this manuscript includes the following:**

(available at [www.sciencetranslationalmedicine.org/cgi/content/full/11/484/eaav0891/DC1](http://www.sciencetranslationalmedicine.org/cgi/content/full/11/484/eaav0891/DC1))

Data file S1 (Microsoft Excel format). Tumor measurements for in vivo studies.

## Supplementary Materials

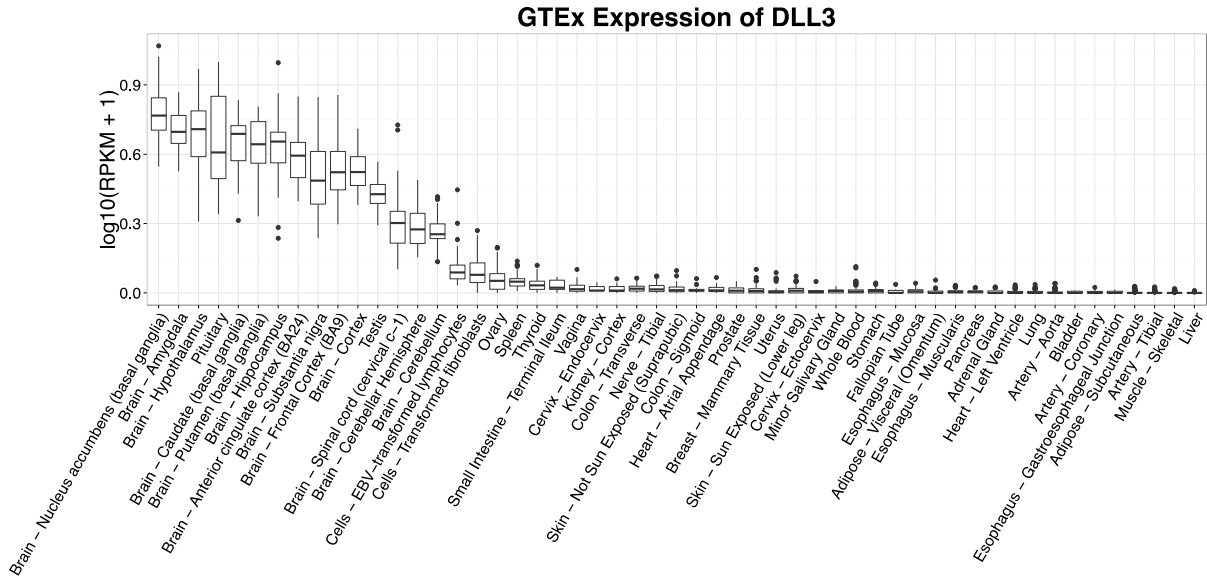

**Fig. S1. Genotype-Tissue Expression (GTEx) expression of DLL3 in adult tissues.**

Expression of DLL3 in multiple adult tissues evaluated using the GTEx database.

Expression values are presented as  $\log_{10}(\text{RPKM}+1)$ .

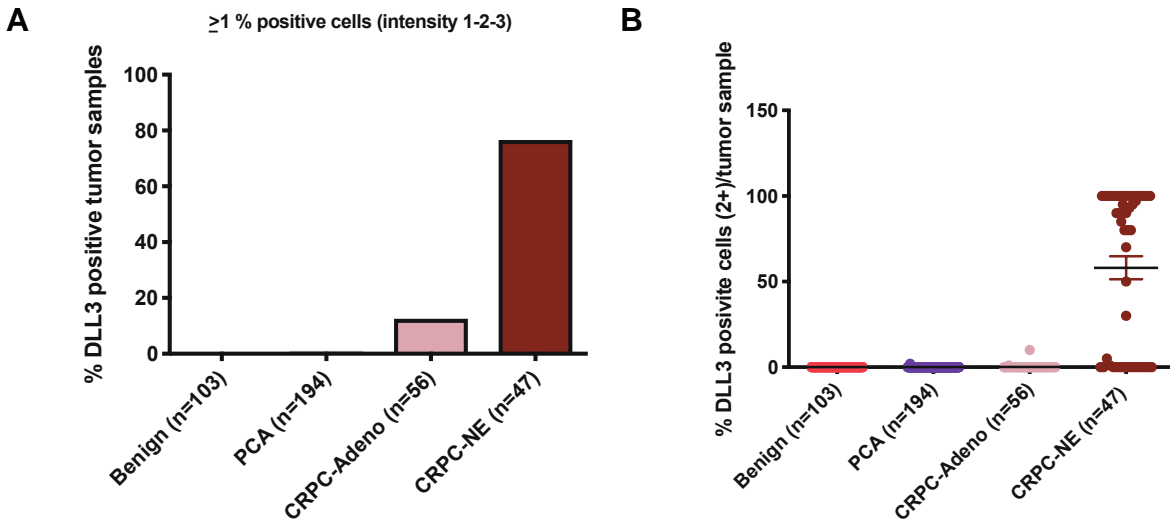

**Fig. S2. Evaluation of DLL3-positive cells per tumor.** **A.** Prostate cancer tumors from different categories: Benign (n=103), PCA (n=194), CRPC-Adeno (n=56), and CRPC-NE (n=47) evaluated by IHC as percentage of DLL3 positive tumor samples. **B.** Prostate samples from different categories (benign n=103), PCA (n=194), CRPC-Adeno (n=56), and CRPC-NE (n=47) were evaluated as percentage of DLL3 positive cells with intensity  $\geq 2$  per tumor sample. Mean value for CRPC-Adeno was 0.1964% of positive cells per case. Mean value for CRPC-NE was 58.11% of positive cells per case. T-test was performed ( $p < 0.0001$ ). The error bars indicate the SEM.

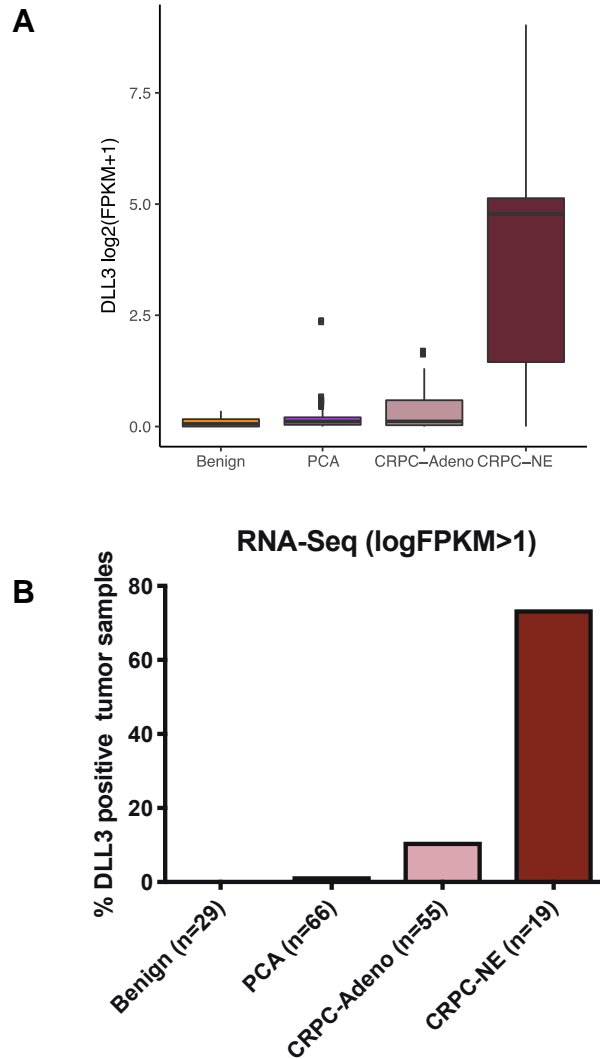

**Fig. S3. *DLL3* expression in patient with prostate cancer cohort by RNA-seq. A.** *DLL3* expression by RNA-Seq evaluated as log<sub>2</sub> (FPKM+1) across multiple disease stages. Mann-Whitney test was performed: CRPC-NE vs CRPC-Adeno p = 2.488e-05, CRPC-NE vs PCA p = 1.432e-05, CRPC-NE vs benign p = 1.392e-05. **B.** Percentage of *DLL3* positive samples evaluated by RNA-Seq across benign (n=29), PCA (n=66), CRPC-Adeno (n=55), and CRPC-NE (n=19).

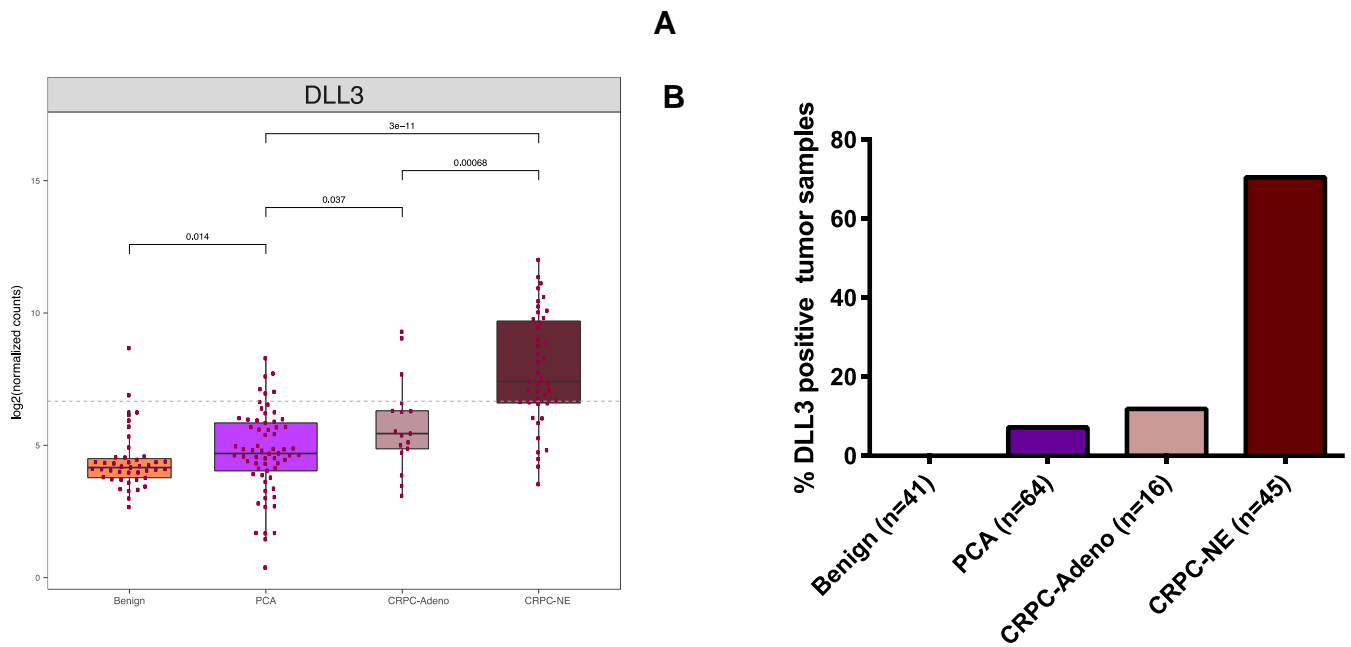

**Fig. S4. *DLL3* expression in prostate cancer cohort evaluated by NanoString. A.** *DLL3* expression evaluated using a custom-designed nanoString panel. Positive cases are considered with values higher than the mean + IQR of the negative controls with the highest maximum value (cut off= 6.667066). This cut off is represented by the dashed line. Wilcoxon test was performed. **B.** Percentage of *DLL3* positive cases evaluated by nanoString across benign (n=41), PCA (n=64), CRPC-Adeno (n=16), and CRPC-NE (n=45) samples.

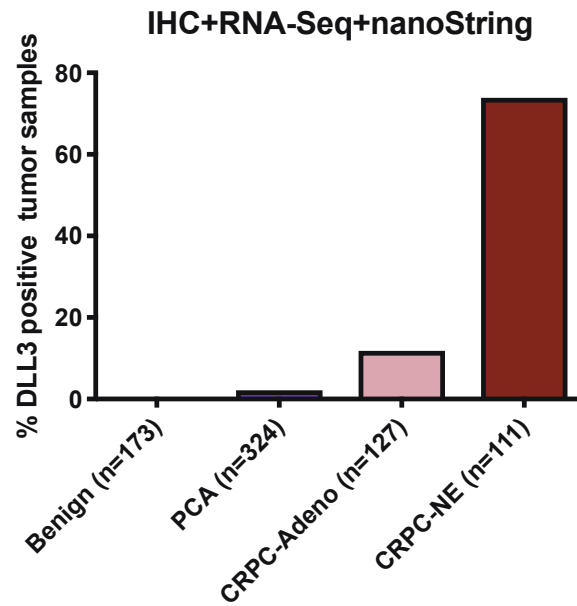

**Fig. S5. DLL3-positive tumors evaluated by IHC, RNA-seq, and NanoString.**

Percentage of DLL3 positive cases evaluated by RNA-Seq, IHC, and nanoString across benign (n=173), PCA (n=324), CRPC-Adeno (n=127), and CRPC-NE (n=111).

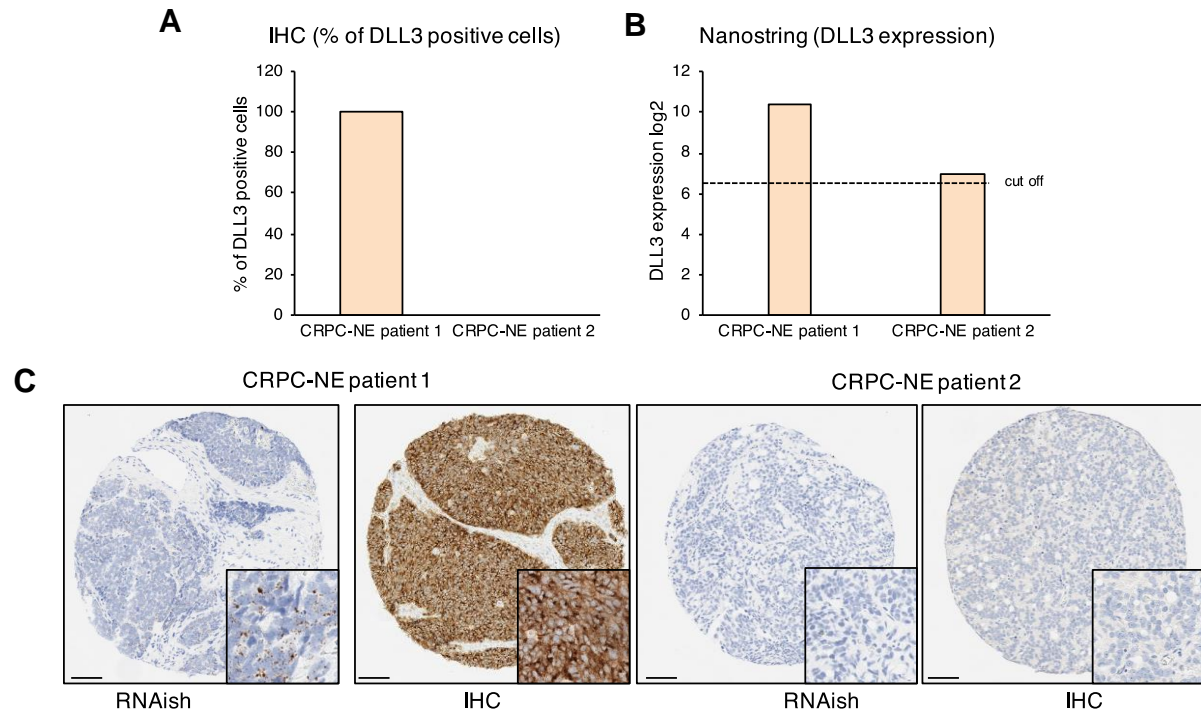

**Fig. S6. Representative images of DLL3 expression.** **A.** Percentage of DLL3 positive cells in two representative CRPC-NE patients. **B.** DLL3 expression evaluated as log<sub>2</sub> in two representative CRPC-NE patients. Cut off of DLL3 expression is indicated by a dashed line (cut off  $\geq$  the mean + IQR of the negative controls with the highest maximum value) (cut off= 6.667066) **C.** Representative IHC and RNAish expression of DLL3 in CRPC-NE patient 1 (expressing DLL3 by IHC and nanoString) and in CRPC-NE patient 2 (expressing DLL3 by nanoString but not IHC) (scale bar: 200  $\mu$ m).



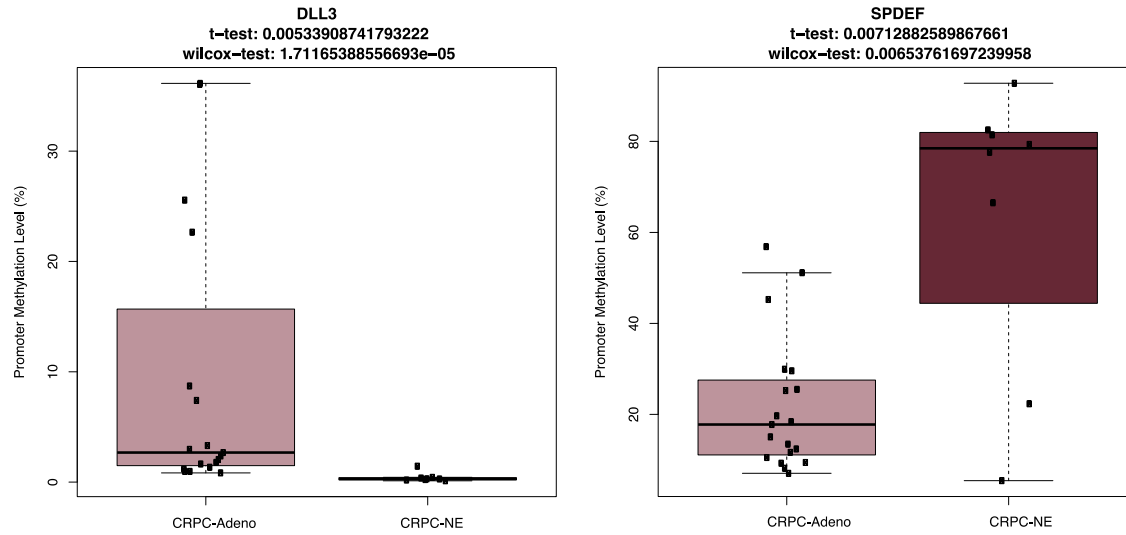

**Fig. S7. *DLL3* promoter methylation.** Promoter methylation analysis of *DLL3* in CRPC-Adeno and CRPC-NE patients. Wilcoxon test  $p=1.71e-5$  for *DLL3*. *SPDEF* promoter hypermethylation in CRPC-NE was used as control.

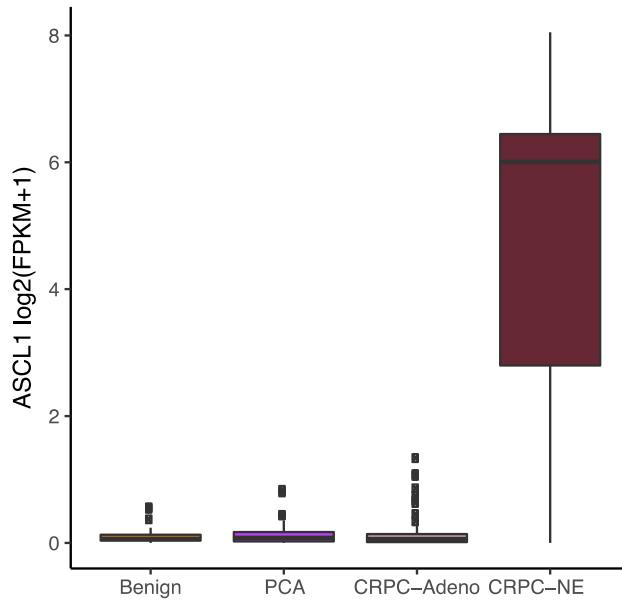

**Fig. S8. ASCL1 expression evaluated by RNA-seq.** ASCL1 expression in prostate cancer patient cohort evaluated as  $\log_2(\text{FPKM}+1)$  across multiple disease stages. Mann-Whitney test was performed. CRPC-NE vs CRPC-Adeno  $p = 8.957e-07$ , CRPC-NE vs PCA  $p = 1.18e-06$ , CRPC-NE vs benign  $p = 8.911e-06$ .

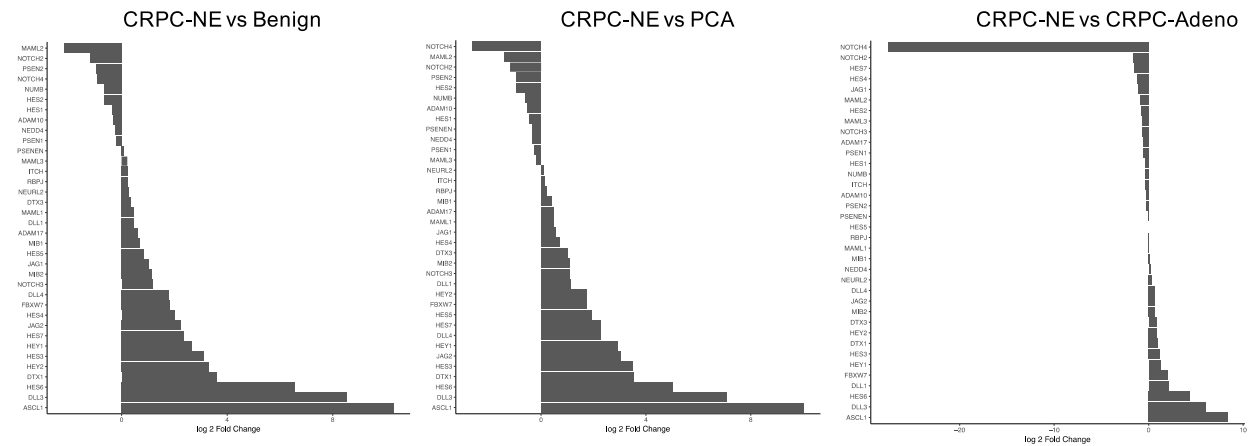

**Fig. S9. Differentially expression analysis of Notch signaling genes.** Differentially expressed Notch signaling genes for CRPC-NE vs benign, CRPC-NE vs PCA, and CRPC-NE vs CRPC-Adeno evaluated as log<sub>2</sub> fold change. *DLL3* and *ASCL1* were the most differentially expressed Notch signaling genes in CRPC-NE versus benign ( $p=6.39E-21$  for *DLL3*;  $p=4.51E-30$  for *ASCL1*), in CRPC-NE versus PCA ( $p=3.40E-21$  for *DLL3*;  $p=2.71E-33$  for *ASCL1*), and in CRPC-NE vs CRPC-Adeno ( $p=1.49E-11$  for *DLL3*  $p=2.11E-19$  for *ASCL1*). We also found *NOTCH2* differentially expressed in CRPC-NE compared to both PCA ( $p=0.03185975$ ) and CRPC-Adeno ( $p=0.02835248$ ), and *NOTCH4* ( $p=3.86E-21$ ) differentially expressed in CRPC-NE vs CRPC-Adeno.

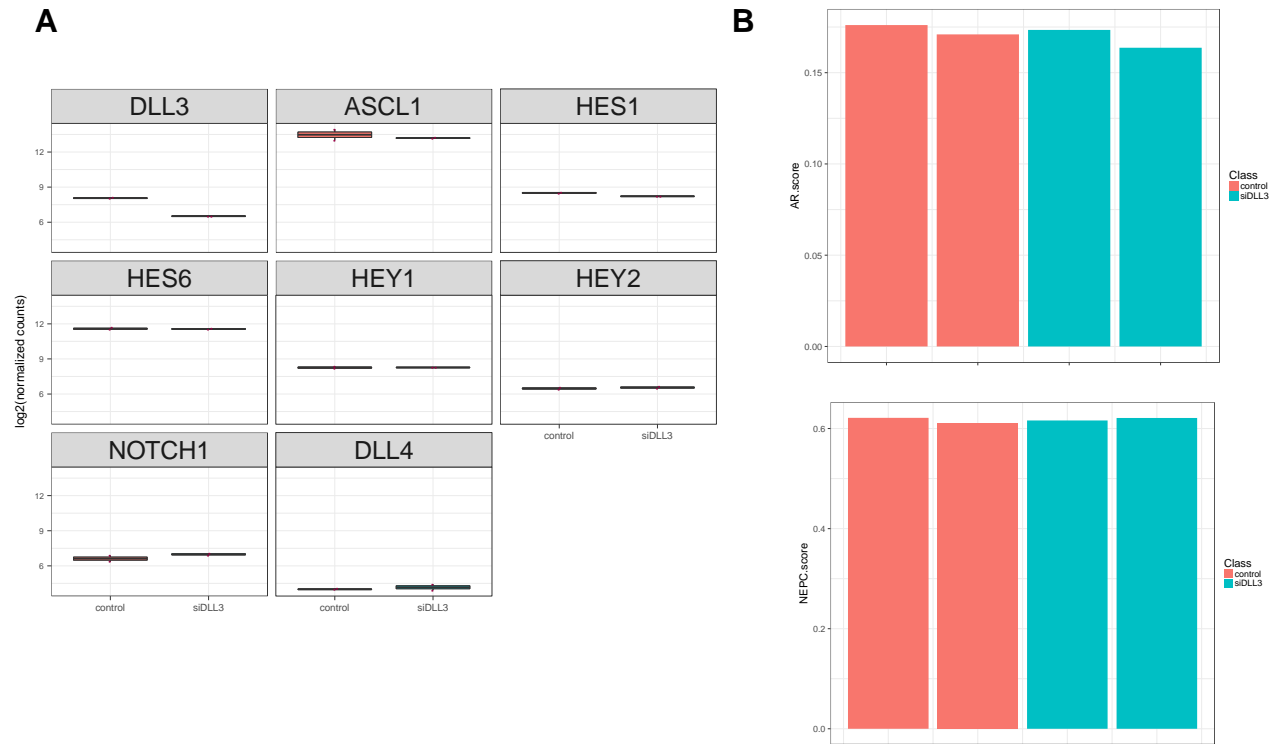

**Fig. S10. Silencing *DLL3* in the NCI-H660 cell line. A.** Evaluation of mRNA expression of genes involved in Notch pathway using the nanoString platform in siDLL3 (light blue) versus siControl (orange) in NCI-H660 cell line. **B.** NEPC and AR signaling scores as defined in (2) in NCI-H660 transfected with siDLL3 vs siControl.

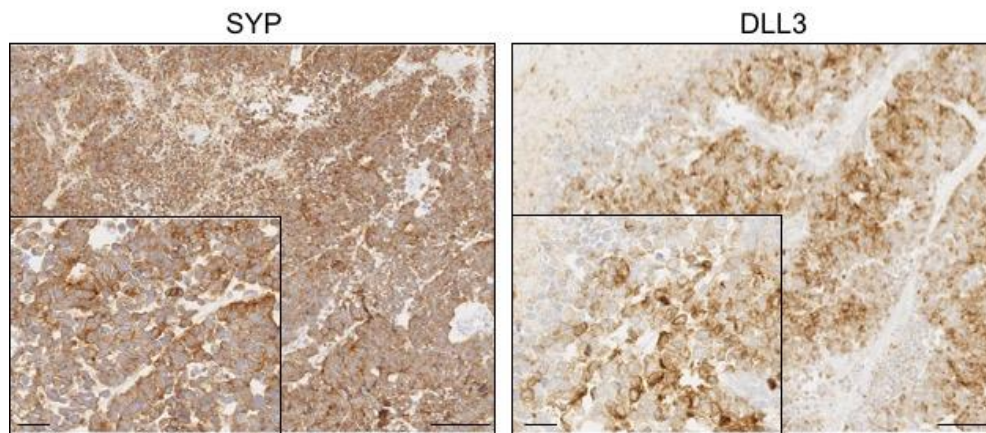

**Fig. S11. Correlation between DLL3-positive and DLL3-negative cells in a tumor biopsy.** Representative images of synaptophysin (SYP) and DLL3 immunohistochemistry are shown (scale bar: 200  $\mu\text{m}$ , inset: 50  $\mu\text{m}$ ). Positive staining for DLL3 is observed in 80% of tumor cells. Positive staining for SYP is observed in 100% of tumor cells.



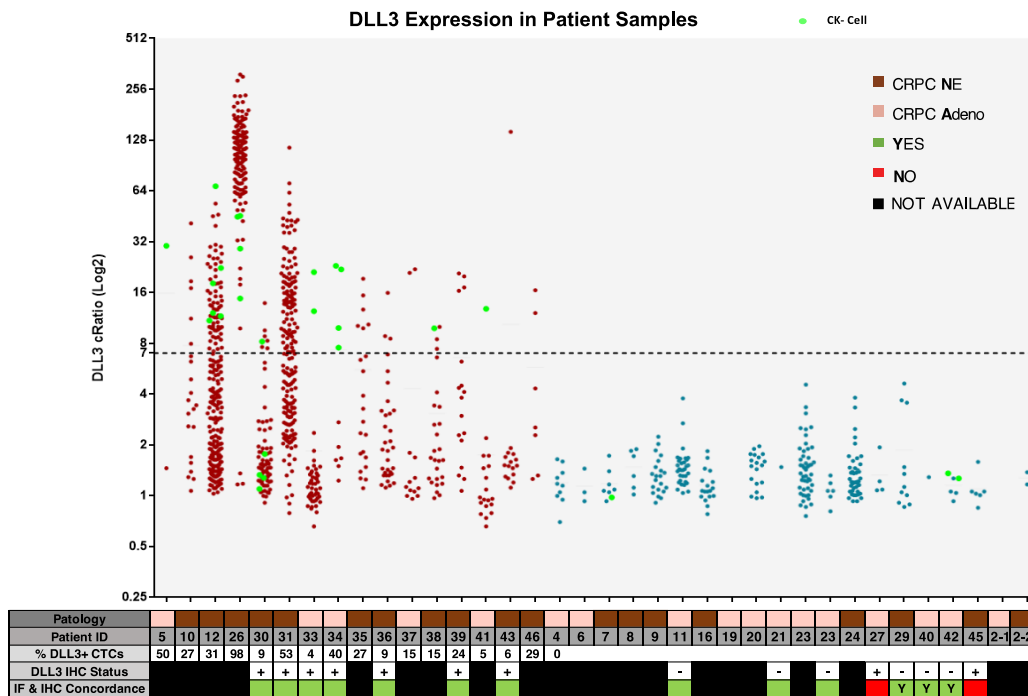

**Fig. S13. CK expression in DLL3-positive and DLL3-negative CTCs.** Graph showing CK- cells (green) among DLL3- and DLL3+ CTCs of 36 CRPC-Adeno and CRPC-NE patients tested with the DLL3 Epic 4-color immunofluorescence (IF) assay. DLL3 cRatio (signal-to-noise ratio) is plotted along the y-axis, and patient ID is plotted along the x-axis. A table with additional patient information is included (CRPC-NE - brown or CRPC-Adeno - light brown).

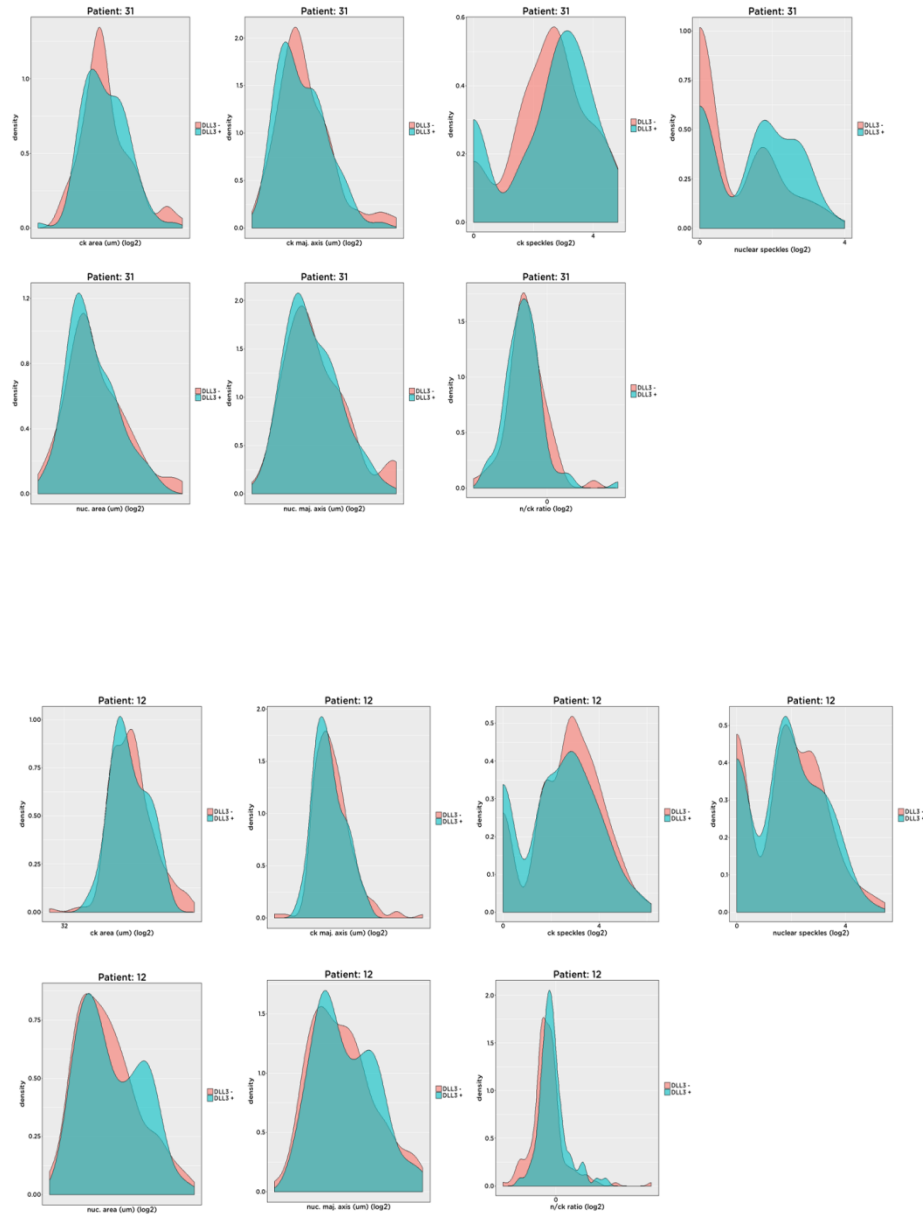

**Fig. S14. Correlation between DLL3-positive and DLL3-negative cells in CTCs.**

Density plots of morphological features in DLL3-positive and DLL3- cells in Patients 31 and 12. The cellular morphological features evaluated in this comparative analysis included: nuclear area, nuclear speckles, nuclear major axis, cytoplasmic area, cytoplasmic speckles, cytoplasmic major axis, and nuclear/cytoplasmic ratio (20).



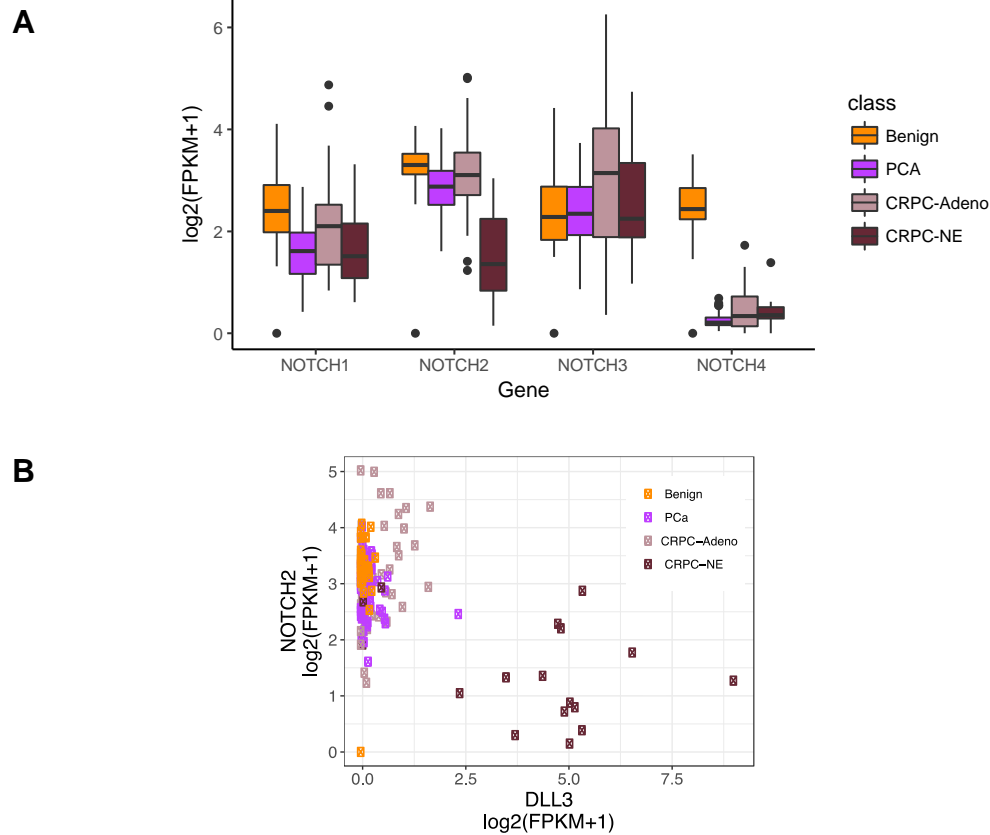

**Fig. S15. Expression of Notch receptors across subtypes of prostate cancer and correlation with *DLL3* expression. A.** Expression of Notch receptors across different subtypes of prostate cancer by RNA-Seq ( $\log_2(\text{FPKM}+1)$ ). CRPC-NE and CRPC-Adeno were compared using Mann-Whitney U-test (NOTCH1: p-value = 0.04773, NOTCH2: p-value =  $2.313 \times 10^{-7}$ , NOTCH3: p-value = 0.2986, NOTCH4: p-value = 0.950).

**B.** Correlation of *DLL3* and *NOTCH2* expression ( $\log_2(\text{FPKM}+1)$ ) in benign, PCA, CRPC-Adeno, and CRPC-NE patients evaluated by RNA-Seq (Spearman correlation with in CRPC-NE samples  $\rho = -0.4263$ ,  $p = 0.0701$ ; in all samples  $\rho = -0.18414$ ,  $p = 0.0165$ ).

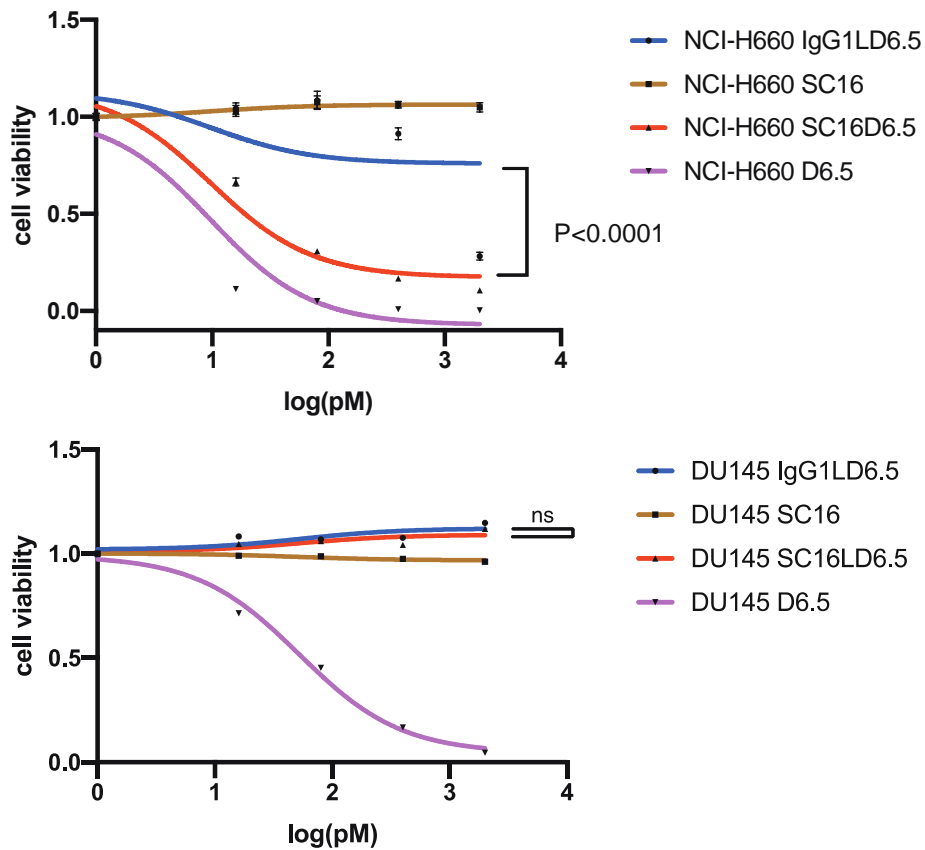

**Fig. S16. In vitro toxicity of SC16LD6.5 in NCI-H660 and DU145.** Cell viability assay to test SC16LD6.5 (red curve), IgG1LD6.5 (blue curve), SC16 (naked DLL3 antibody) (brown curve), and D6.5 (small molecule PBD warhead) (purple curve) in DU145 and NCI-H660 cell lines. Escalated doses were used as shown on the x axis. For DU145, treatment was performed for 72 hours (n = 9 for each treatment dose, error bars: SEM) For NCI-H660, treatment was performed for 13 days with replenishing of drug after 6 days (n=9 for each treatment dose, error bars: SEM). Two-way ANOVA test was used;  $p < 0.0001$  for SC16LD6.5 versus IgG1LD6.5 in NCI-H660; not significant (ns) in DU145.

**Table S1. Clinical and pathological features of patients with CRPC-Adeno and PCA-expressing DLL3 by IHC.**

Table of CRPC-Adeno and localized PCA patients expressing DLL3 with  $\geq 1\%$  of positive cells (intensity 1-2-3) showing SYP expression by IHC, presence of neuroendocrine markers in serum, and pathological features of high grade/ poorly differentiated tumors.

| Patient ID | Diagnosis     | % DLL3-cells (no expression 0) | % DLL3+ cells (intensity 1) | % DLL3+ cells (intensity 2) | % DLL3+ cells (intensity 3) | SYP (IHC) | Site of mets                       | High serum CGA and/or NSE | Pathological features                                                |
|------------|---------------|--------------------------------|-----------------------------|-----------------------------|-----------------------------|-----------|------------------------------------|---------------------------|----------------------------------------------------------------------|
| 1          | CRPC-Adeno    | 20                             | 70                          | 10                          | 0                           | n/a       | n/a                                | n/a                       | High grade adeno carcinoma with histological neuroendocrine features |
| 2          | CRPC-Adeno    | 0                              | 100                         | 0                           | 0                           | yes       | n/a                                | n/a                       | High grade adeno carcinoma                                           |
| 3          | CRPC-Adeno    | 0                              | 100                         | 0                           | 0                           | yes       | bone, lymph node, stomach, bladder | n/a                       | Poorly differentiated carcinoma                                      |
| 4          | CRPC-Adeno    | 0                              | 100                         | 0                           | 0                           | yes       | bone                               | n/a                       | Poorly differentiated adeno carcinoma                                |
| 5          | CRPC-Adeno    | 0                              | 100                         | 0                           | 0                           | yes       | n/a                                | n/a                       | High grade adeno carcinoma                                           |
| 6          | Localized PCA | 98                             | 0                           | 2                           | 0                           | n/a       | bone                               | yes                       | Localized adeno carcinoma                                            |
| 7          | CRPC-Adeno    | 99                             | 0                           | 1                           | 0                           | n/a       | bone                               | yes                       | High grade adeno carcinoma                                           |

**Table S2. Genomic features of WCM1388 patient metastatic sites.**

Table representing genomic features of prostate and liver tumor from the same patient (WCM1388). *RB1*, *TP53*, and *PTEN* alterations are reported.

| Gene        | Prostate | Liver    |
|-------------|----------|----------|
| <i>RB1</i>  | deletion | deletion |
| <i>TP53</i> | mutation | mutation |
| <i>PTEN</i> | deletion | deletion |

**Table S3. Clinical features of patients with CRPC-Adeno with DLL3-positive CTCs.**

Table presenting features of 5 CRPC-Adeno patients expressing DLL3 in CTCs. Sites of metastasis, neuroendocrine markers in serum, previous therapy, and genomic features (*TP53* and *RB1* loss or mutated) are indicated. Patient ID is indicated as Weill Cornell Medicine (WCM) with an identifying number (patient not treated at WCM is indicated as “no WCM”).

| ID pts  | Site of mets                      | Serum NE markers level (CGA, NSE) | Platinum-based therapy (yes/no) | Genomic features                |
|---------|-----------------------------------|-----------------------------------|---------------------------------|---------------------------------|
| WCM758  | Liver, bone, lymph node           | high                              | no                              | No alt                          |
| WCM861  | Liver, bone, lymph node, lung     | normal                            | no                              | <i>TP53</i> and <i>RB1</i> mut  |
| WCM1344 | Liver, bone, soft tissue          | normal                            | yes                             | <i>TP53</i> and <i>RB1</i> loss |
| no WCM  | Liver, bone, soft tissue, pleural | high                              | yes                             | Not available                   |
| WCMC13  | Liver, lymph node                 | Not available                     | yes                             | Not available                   |

**Table S4. Serum pharmacokinetics parameters after peritoneal administration of rovalpituzumab tesirine (SC16LD6.5).**

Table showing the pharmacokinetics of SC16LD6.5 (ADC) in NU/J and NOD/SCID mice after intraperitoneal administration of the compound. Serum was collected at 5 min (NOD/SCID only), 4, 24, 72, 168, and 336 hours. Pharmacokinetic parameters ( $C_{max}$ -maximum serum concentration and exposure [AUC (area under the curve) (0- $\infty$ )] are listed in the table. All values summarized by geometric mean.

| Strain   | Dose [mg/kg] | ADC                                                      |                         |
|----------|--------------|----------------------------------------------------------|-------------------------|
|          |              | AUC <sub>(0-<math>\infty</math>)</sub> [day* $\mu$ g/mL] | $C_{max}$ [ $\mu$ g/mL] |
| NU/J     | 0.25         | 7.1                                                      | 1.0                     |
| NU/J     | 0.5          | 13                                                       | 1.4                     |
| NU/J     | 1            | 22                                                       | 4.3                     |
| NOD/SCID | 0.2          | 2.1                                                      | 1.0                     |
| NOD/SCID | 0.4          | 5.8                                                      | 4.3                     |
| NOD/SCID | 0.8          | 12.2                                                     | 14.1                    |
| NOD/SCID | 1.6          | 20.3                                                     | 33.9                    |
